# Supplementary material for: Comparison of IgG against plastic resin in workers with and without chemical dermatitis
Source: Springer Nature journal article supplement (doi:10.1186/s12889-015-2302-4), 2015-09-21
Supplement: MOESM1 [file 9750440]

| ID | Age | Gender | Smoking | Alcohol  | History               | Allergic Dis |
|----|-----|--------|---------|----------|-----------------------|--------------|
| 1  | 34  | male   | Ex      | No       | Allergic Rhinitis?    | 1            |
| 2  | 41  | male   | Yes     | Habitual | —                     | 0            |
| 3  | 35  | male   | Yes     | Habitual | Atopic dermatitis     | 1            |
| 4  | 35  | male   | Yes     | Habitual | —                     | 0            |
| 5  | 55  | male   | Yes     | Habitual | —                     | 0            |
| 6  | 57  | male   | No      | Habitual | —                     | 0            |
| 7  | 56  | male   | Yes     | Habitual | —                     | 0            |
| 8  | 37  | male   | Yes     | Habitual | —                     | 0            |
| 9  | 34  | male   | No      | No       | Pollin allergy        | 1            |
| 10 | 33  | male   | Yes     | Habitual | —                     | 0            |
| 11 | 40  | male   | Yes     | No       | —                     | 0            |
| 12 | 54  | male   | Yes     | Habitual | —                     | 0            |
| 13 | 32  | male   | Yes     | No       | Allergic Rhinitis     | 1            |
| 14 | 29  | male   | Yes     | No       | —                     | 0            |
| 15 | 33  | male   | Yes     | Habitual | —                     | 0            |
| 16 | 35  | male   | Yes     | Habitual | —                     | 0            |
| 17 | 37  | male   | Yes     | Habitual | Allergic to shellfish | 1            |
| 18 | 58  | male   | No      | No       | Allergic to shellfish | 1            |
| 19 | 60  | male   | Yes     | No       | —                     | 0            |
| 20 | 58  | male   | No      | Habitual | —                     | 0            |

| Dermatitis Y/N | Usage of Product X | IgG against Product X | IgG against BADGE | IgG against XDA | IgG against BEE | IgE against Product X |
|----------------|--------------------|-----------------------|-------------------|-----------------|-----------------|-----------------------|
| 1              | 1                  | 1                     | 1                 | 0               | 0               | 0                     |
| 1              | 1                  | 1                     | 0                 | 0               | 0               | 0                     |
| 0              | 1                  | 0                     | 0                 | 0               | 0               | 0                     |
| 0              | 1                  | 1                     | 0                 | 0               | 0               | 0                     |
| 0              | 1                  | 1                     | 0                 | 0               | 0               | 0                     |
| 1              | 1                  | 1                     | 0                 | 0               | 0               | 0                     |
| 1              | 1                  | 1                     | 0                 | 0               | 0               | 0                     |
| 1              | 1                  | 1                     | 0                 | 0               | 0               | 0                     |
| 1              | 1                  | 1                     | 0                 | 0               | 0               | 0                     |
| 1              | 1                  | 1                     | 0                 | 0               | 0               | 0                     |
| 1              | 1                  | 1                     | 0                 | 0               | 0               | 0                     |
| 1              | 1                  | 1                     | 1                 | 1               | 0               | 0                     |
| 1              | 1                  | 1                     | 0                 | 0               | 0               | 0                     |
| 0              | 1                  | 0                     | 0                 | 0               | 0               | 0                     |
| 0              | 1                  | 1                     | 0                 | 0               | 0               | 0                     |
| 1              | 1                  | 1                     | 0                 | 0               | 0               | 0                     |
| 0              | 1                  | 1                     | 0                 | 0               | 0               | 0                     |
| 0              | 1                  | 0                     | 0                 | 0               | 0               | 0                     |
| 0              | 1                  | 0                     | 0                 | 0               | 0               | 0                     |
| 1              | 1                  | 1                     | 1                 | 0               | 1               | 0                     |
| 0              | 1                  | 1                     | 0                 | 0               | 0               | 0                     |

| IgE against<br>BADGE | IgE against<br>XDA | IgE against<br>BEE | Dermatoph<br>agoides<br>farinae | House<br>dust | Cat  | Dog  | Timothy<br>grass | Vernal<br>grass |
|----------------------|--------------------|--------------------|---------------------------------|---------------|------|------|------------------|-----------------|
| 0                    | 0                  | 0                  | 68.3                            | 3.43          | 0.27 | 0.29 | 0.73             | 0.31            |
| 0                    | 0                  | 0                  | 0.76                            | 0.11          | 0    | 0.21 | 18.4             | 12.7            |
| 0                    | 0                  | 0                  | 99.8                            | 14            | 1.46 | 24.1 | 2.24             | 1.86            |
| 0                    | 0                  | 0                  | 70.5                            | 2.88          | 0    | 0.35 | 0.55             | 0.25            |
| 0                    | 0                  | 0                  | 0.69                            | 0.38          | 0.58 | 1.7  | 8.2              | 11.1            |
| 0                    | 0                  | 0                  | 0                               | 0             | 0    | 0.07 | 0.22             | 0.1             |
| 0                    | 0                  | 0                  | 0                               | 0.09          | 0.16 | 0.47 | 0.23             | 0               |
| 0                    | 0                  | 0                  | 22.1                            | 0.45          | 0    | 0.48 | 0.26             | 0               |
| 0                    | 0                  | 0                  | 1.89                            | 0.42          | 5.19 | 0.28 | 0.35             | 0.09            |
| 0                    | 0                  | 0                  | 0.44                            | 0.37          | 0.24 | 0.12 | 0.16             | 0.04            |
| 0                    | 0                  | 0                  | 0.27                            | 0.41          | 1.24 | 0.33 | 0.42             | 0.02            |
| 0                    | 0                  | 0                  | 0.31                            | 0.32          | 0.22 | 0.27 | 0.35             | 0.12            |
| 0                    | 0                  | 0                  | 20.8                            | 0.84          | 0.23 | 0.19 | 0.27             | 0.06            |
| 0                    | 0                  | 0                  | 26.4                            | 0             | 0    | 0    | 0                | 0               |
| 0                    | 0                  | 0                  | 0.31                            | 0.06          | 0.08 | 0.17 | 0.16             | 0               |
| 0                    | 0                  | 0                  | 0.67                            | 0.07          | 0.27 | 0.55 | 1.24             | 0.33            |
| 0                    | 0                  | 0                  | 2.26                            | 0             | 0    | 0    | 0                | 0               |
| 0                    | 0                  | 0                  | 99.9                            | 19.1          | 0.83 | 1.59 | 99.9             | 75.3            |
| 0                    | 0                  | 0                  | 0.44                            | 0.12          | 0    | 0.56 | 0.32             | 0.14            |
| 0                    | 0                  | 0                  | 0.24                            | 0.12          | 0    | 0.43 | 0.8              | 0.94            |

| Ragweed mix | Mugwort | Japanese cedar | Penicillin | Cladosporium | Candida | Alternaria | Aspergillus | Wheat |
|-------------|---------|----------------|------------|--------------|---------|------------|-------------|-------|
| 0.07        | 0.1     | 1.21           | 0          | 0.06         | 0.1     | 0          | 0.14        | 0     |
| 0           | 0.08    | 0.72           | 0          | 0            | 0       | 0          | 0.14        | 0     |
| 4.06        | 96.4    | 31.1           | 2.38       | 2.08         | 1.17    | 0          | 3.99        | 1.56  |
| 0           | 0       | 0.65           | 0          | 0            | 0       | 0          | 0           | 0     |
| 4.46        | 53.1    | 49.8           | 0.55       | 0.33         | 1.13    | 0.77       | 0.75        | 1.47  |
| 0           | 0       | 0.07           | 0          | 0.05         | 0       | 0.04       | 0.12        | 0.1   |
| 0           | 0       | 0.02           | 0          | 0            | 0.01    | 0          | 0.03        | 0.05  |
| 0.09        | 0.09    | 8.53           | 0          | 0            | 0       | 0          | 0.08        | 0     |
| 0.06        | 0.06    | 81.5           | 0.07       | 0.25         | 0.33    | 0.08       | 0.32        | 0.09  |
| 0.06        | 0.12    | 0              | 0.05       | 0            | 0.06    | 0.03       | 0.23        | 0.09  |
| 0           | 1.93    | 27.9           | 0          | 0            | 0       | 0          | 0           | 0     |
| 0.1         | 0.24    | 0.1            | 0.07       | 0.09         | 0.09    | 0.12       | 0.17        | 0     |
| 0.09        | 0.08    | 0              | 0          | 0.01         | 0       | 0.03       | 0.11        | 0     |
| 0           | 0       | 0              | 0          | 0            | 0       | 0          | 0           | 0     |
| 0           | 0       | 2.48           | 0          | 0            | 0       | 0          | 0.07        | 0     |
| 0.02        | 0       | 1.13           | 0.11       | 0            | 0.09    | 0.22       | 0.47        | 0.14  |
| 0           | 0       | 0              | 0          | 0.14         | 0       | 0          | 0.12        | 0     |
| 0.62        | 0.45    | 0.58           | 0.44       | 0.24         | 0.22    | 0.31       | 0.69        | 0.28  |
| 0.16        | 0       | 0              | 0          | 0            | 0       | 0          | 0.13        | 0     |
| 0.01        | 0       | 1.38           | 0          | 0            | 0       | 0          | 0.3         | 0     |

| Soy bean | Rice | Tuna | Salmon | Shrimp | Crab | Cheddar cheese | Milk | Beef |
|----------|------|------|--------|--------|------|----------------|------|------|
| 0.13     | 0.08 | 0.13 | 0.05   | 0.04   | 0.2  | 0.27           | 0.42 | 0.14 |
| 0        | 0.14 | 0    | 0      | 0      | 0    | 0              | 0.12 | 0    |
| 1.37     | 1.11 | 1.26 | 0.59   | 0.98   | 6.52 | 0.21           | 1.13 | 0.8  |
| 0        | 0    | 0.02 | 0.09   | 0.01   | 0.1  | 0              | 0    | 0    |
| 2.58     | 2.93 | 0.62 | 0.55   | 0.58   | 0.37 | 0.14           | 0.35 | 0.76 |
| 0.05     | 0.03 | 0    | 0.09   | 0.04   | 0    | 0.15           | 0    | 0.16 |
| 0        | 0.02 | 0    | 0.05   | 0      | 0.07 | 0.01           | 0.05 | 0    |
| 0        | 0    | 0.09 | 0      | 0      | 0    | 0              | 0    | 0    |
| 0.07     | 0.08 | 0.02 | 0.22   | 0.17   | 0.14 | 0.15           | 0.15 | 0    |
| 0.21     | 0    | 0.19 | 0.07   | 0.27   | 0.04 | 0.06           | 0.27 | 0.09 |
| 0        | 0    | 0    | 0.03   | 0      | 0    | 0              | 0    | 0    |
| 0.13     | 0.05 | 0.06 | 0.23   | 0.05   | 0.22 | 0.01           | 0.08 | 0.08 |
| 0.02     | 0    | 0.11 | 0.05   | 0.07   | 0.13 | 0              | 0    | 0    |
| 0        | 0    | 0    | 0      | 0      | 0    | 0              | 0    | 0    |
| 0        | 0    | 0    | 0      | 0      | 0    | 0              | 0    | 0    |
| 0.11     | 0.06 | 0.16 | 0.01   | 0.18   | 0.12 | 0.1            | 0.14 | 0.01 |
| 0        | 0    | 0    | 0      | 0.91   | 9.48 | 0              | 0    | 0    |
| 0.29     | 0.38 | 0.52 | 0.47   | 0.28   | 2.01 | 0.05           | 0.21 | 0.12 |
| 0.05     | 0    | 0.26 | 0.02   | 0      | 0.18 | 0              | 0.09 | 0    |
| 0        | 0    | 0.02 | 0.15   | 0      | 0    | 0              | 0    | 0    |

| Chicken | Egg white | Cortisol | IgE Non-specific | IFNgamma (human) | IL-1beta | IL-2 | IL-5 | IL-4 |
|---------|-----------|----------|------------------|------------------|----------|------|------|------|
| 0.07    | 0.19      | 2.6      | 215              | <DL              | 5        | <DL  | 6.2  | 31.1 |
| 0       | 0         | 4.2      | 424              | <DL              | 5        | <DL  | 5.3  | 19.8 |
| 1.02    | 0.53      | 4.1      | 1930             | <DL              | 13       | <DL  | 2.5  | 5.5  |
| 0.01    | 0.08      | 5        | 76.6             | <DL              | 5        | <DL  | 2.5  | 8    |
| 0.89    | 0.34      | 5.8      | 1030             | <DL              | 5        | <DL  | 5.2  | 9.8  |
| 0       | 0.12      | 4.8      | 132              | <DL              | 5        | <DL  | 6.2  | 21.9 |
| 0.03    | 0.12      | 2.5      | 15.1             | <DL              | 5        | <DL  | 8    | 11.6 |
| 0       | 0.05      | 2.8      | 69.9             | <DL              | 5        | <DL  | 6.7  | 10.1 |
| 0.05    | 0.21      | 12       | 84.3             | <DL              | 5        | <DL  | 5.2  | 5.1  |
| 0.08    | 0.12      | 4.3      | 63.9             | <DL              | 5        | <DL  | 6.2  | 10.8 |
| 0       | 0.36      | 7.6      | 80.8             | <DL              | 5        | <DL  | 6.2  | 6    |
| 0.07    | 0.18      | 7.9      | 348              | <DL              | 5        | <DL  | 9    | 3.6  |
| 0       | 0.08      | 19.4     | 21.8             | <DL              | 5        | <DL  | 5.3  | 5.6  |
| 0       | 0         | 10.3     | 6.9              | <DL              | 5        | <DL  | 9    | 6.1  |
| 0       | 0         | 8.3      | 442              | <DL              | 5        | <DL  | 8    | 6.8  |
| 0.08    | 0.24      | 4.3      | 182              | <DL              | 5        | <DL  | 8.1  | 4.6  |
| 0       | 0         | 4.1      | 27.4             | <DL              | 5        | <DL  | 2.5  | 11.1 |
| 0.08    | 0.29      | 7.8      | 486              | <DL              | 5        | <DL  | 5.4  | 8.3  |
| 0       | 0.04      | 7.6      | 28.6             | <DL              | 5        | <DL  | 2.5  | 14.7 |
| 0       | 0.06      | 3.5      | 64.9             | <DL              | 5        | <DL  | 5.8  | 7.2  |

| IL-6 | CD8(+)<br>CD4(+) | CD8(+)<br>CD4(-) | CD8(-)<br>CD4(+) | CD8(-)<br>CD4(-) | CD4/CD8r<br>atio |
|------|------------------|------------------|------------------|------------------|------------------|
| 1.9  | 1.5              | 37.7             | 45.1             | 15.7             | 1.19             |
| 1.3  | 1.5              | 24.2             | 38.7             | 35.6             | 1.56             |
| 1.5  | 0.9              | 23.9             | 59.1             | 16.1             | 2.42             |
| 1.3  | 0.4              | 15.2             | 62.2             | 22.2             | 4.01             |
| 1.5  | 0.6              | 26.1             | 52.1             | 21.2             | 1.97             |
| 0.8  | 1.7              | 18.1             | 57.8             | 22.4             | 3.01             |
| 1.6  | 5.5              | 23.9             | 52.8             | 17.8             | 1.98             |
| 0.8  | 1.1              | 26.8             | 48.4             | 23.7             | 1.77             |
| 0.9  | 0.4              | 30.6             | 31.8             | 37.2             | 1.04             |
| 1.2  | 0.6              | 28.4             | 49.3             | 21.7             | 1.72             |
| 1.1  | 1.1              | 30               | 53.8             | 15.1             | 1.77             |
| 2.6  | 2                | 24.5             | 53.6             | 19.9             | 2.1              |
| 41.2 | 1.9              | 35.1             | 43.7             | 19.3             | 1.23             |
| 0.8  | 0.8              | 26.4             | 47.3             | 25.5             | 1.77             |
| 0.6  | 1                | 33.2             | 47.4             | 18.4             | 1.42             |
| 1.4  | 1.3              | 25.5             | 46.8             | 26.4             | 1.79             |
| 1.2  | 0.6              | 25.3             | 47.7             | 26.4             | 1.86             |
| 0.8  | 1.4              | 23.9             | 47.2             | 27.5             | 1.92             |
| 18.6 | 2.2              | 14.5             | 49.8             | 33.5             | 3.11             |
| 0.9  | 0.8              | 19.3             | 54.6             | 25.3             | 2.76             |
